# Supplementary material for: Mono-Rhamnolipid Biosurfactants Synthesized by Pseudomonas aeruginosa Detrimentally Affect Colorectal Cancer Cells
Source: MDPI journal article supplement (doi:10.3390/pharmaceutics14122799), 2022-12-14
Supplement: s1 [file s1]

## Supplementary Materials: Mono-Rhamnolipid Biosurfactants Synthesized by *Pseudomonas aeruginosa* Detrimentally Effect Colorectal Cancer Cells

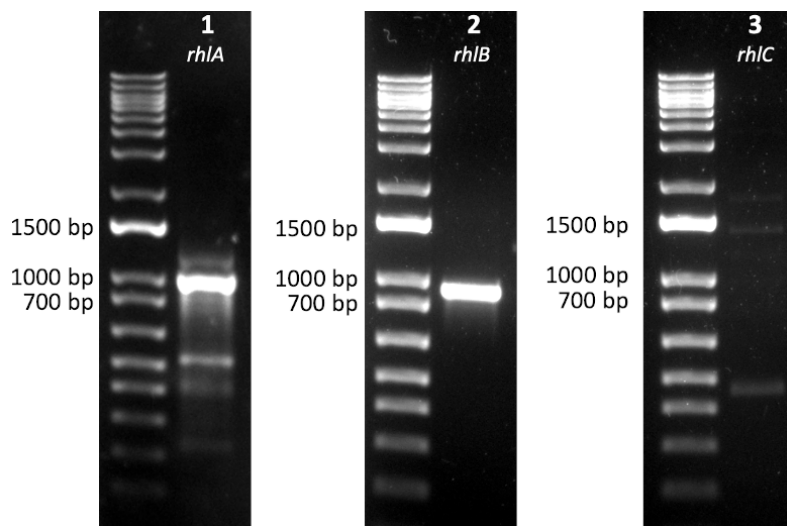

**Figure S1.** Amplified DNA fragments resulting from the PCR screening for RL biosynthesis genes *rhlA*, *rhlB* and *rhlC* in *P. aeruginosa* PAO1  $\Delta rhlC$ . The lack of an amplification product at  $\approx 800$  bp for *rhlC* is confirmation of mutation of this gene within the strain.

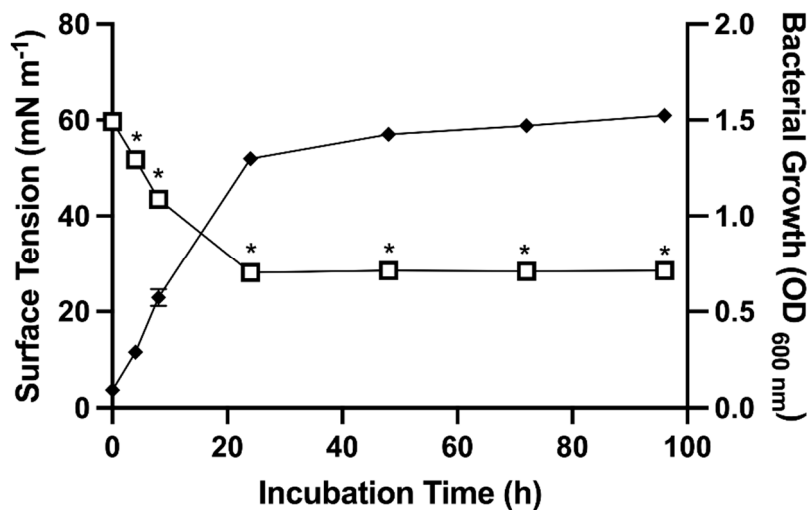

**Figure S2.** Growth and surface tension measurements of *P. aeruginosa* PAO1  $\Delta rhlC$  over 96 h. Bacterial growth of in NB supplemented with 1% (*v/v*) glycerol ( $\blacklozenge$ ). Surface tension measurement of cell-free supernatant samples obtained from cultures over time ( $\square$ ). Error bars represent standard deviation from the mean ( $n = 3$ ). Analysis of surface tension measurements was by two-way ANOVA with post hoc. comparison to surface tension at  $t = 0$  h ( $* = p \leq 0.05$ ).

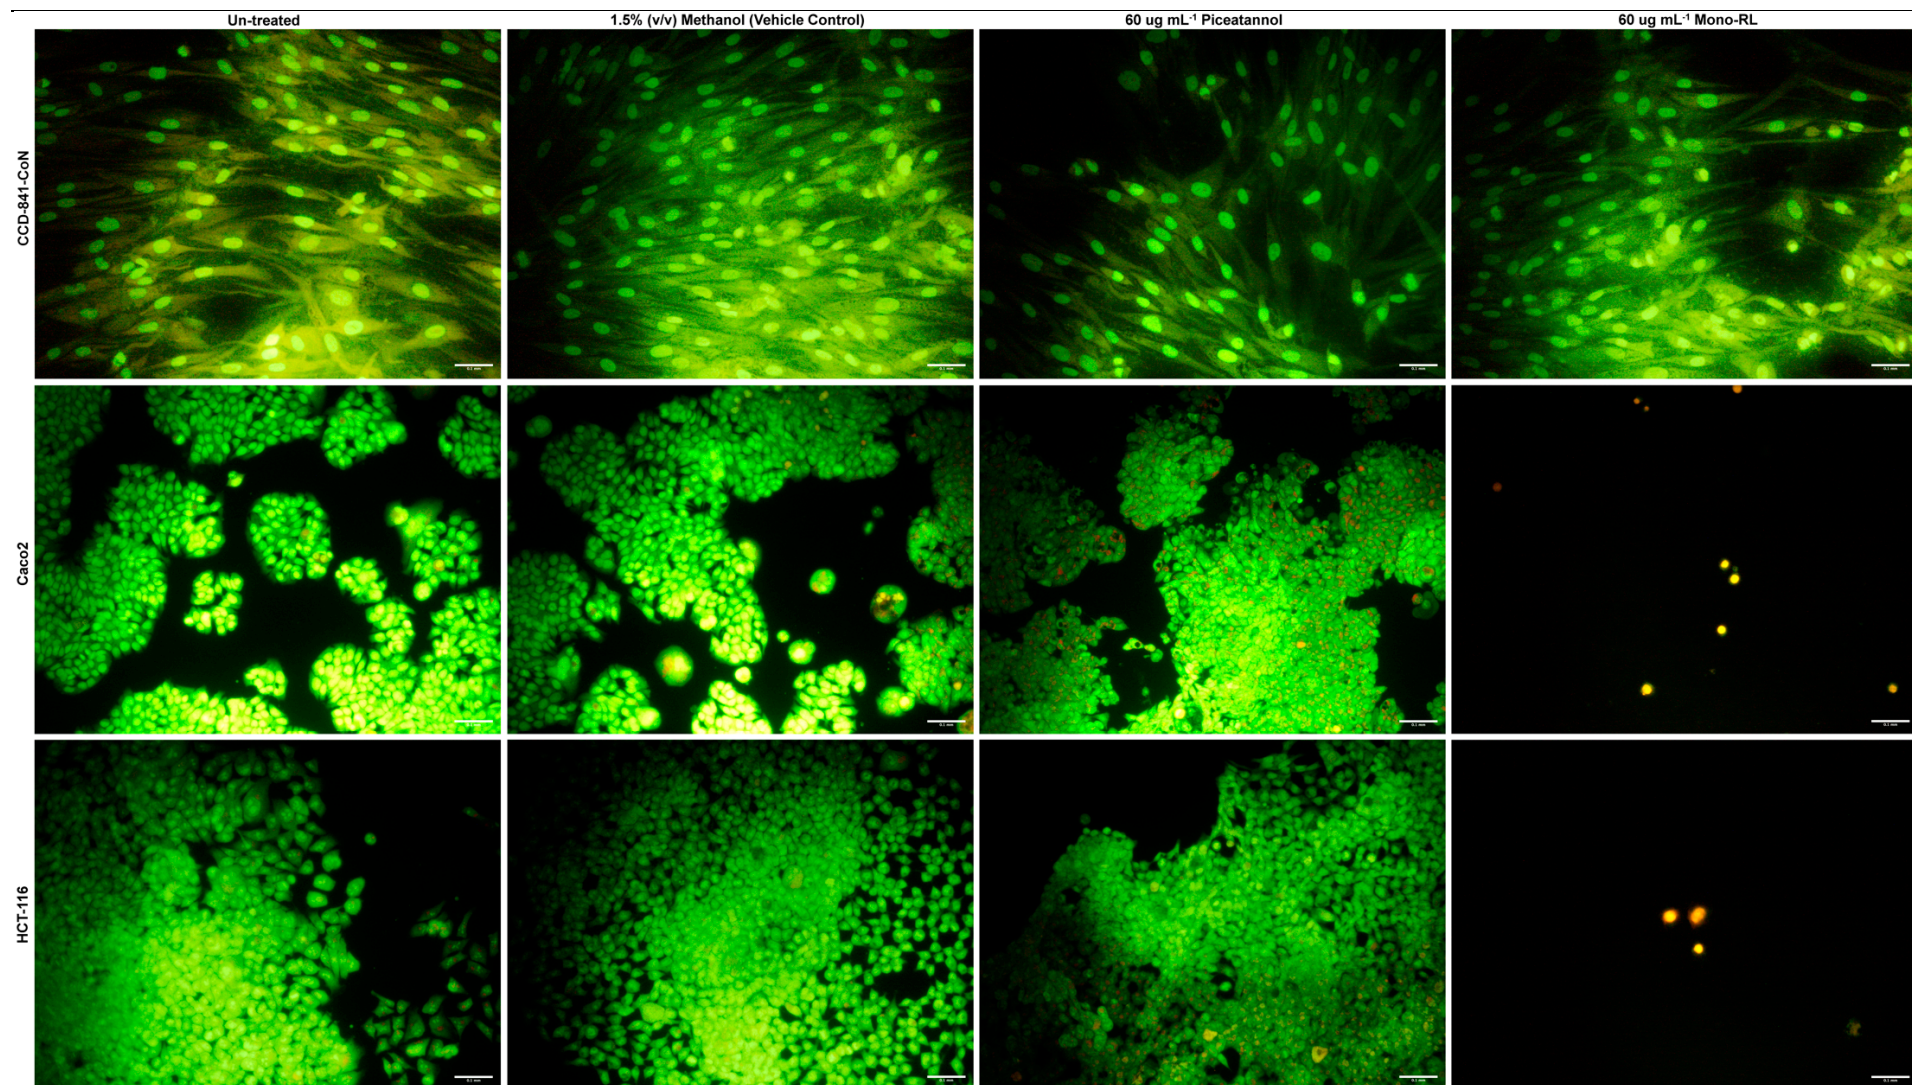

**Figure S3.** Images of AO/ PI-stained cell lines. CCD-841-CoN, Caco2 and HCT-116 either un-treated or following 24 h of treatment with 1.5% (*v/v*) methanol (vehicle control); 60  $\mu\text{g mL}^{-1}$  piceatannol; or 60  $\mu\text{g mL}^{-1}$  mono-RL. Cells were imaged at 200 $\times$  magnification, scale bar = 100  $\mu\text{m}$ .

**Table S1.** PCR primer pairs used in this study and their melting temperatures. Oligonucleotide primers were obtained in lyophilized form from *Eurofins Genomics*, Germany, reconstituted in nuclease free distilled H<sub>2</sub>O at a concentration of 100 µM and utilized in each PCR at a working concentration of 0.5 µM.

| Gene Amplified | Primer Pair    | Sequence (5'-3')     | Melting Temp. (°C) |
|----------------|----------------|----------------------|--------------------|
| 16S rRNA       | 27-F           | AGAGTTTGATCMTGGCTCAG | 56.3               |
|                | 1492-R         | CGGTTACCTTGTTACGACTT | 55.3               |
|                | 907-R *        | CCGTCAATTCMTTTRAGTTT | 51.1               |
| <i>rhlA</i>    | <i>rhlA</i> -F | AGACGTACTCGTAGACCGGC | 61.4               |
|                | <i>rhlA</i> -R | AAGGACGACGAGGTGGAAAT | 57.3               |
| <i>rhlB</i>    | <i>rhlB</i> -F | CCCGTAGTTCTGCATCTGGT | 59.3               |
|                | <i>rhlB</i> -R | AACTGCAACGCTTTCTCGAT | 55.3               |
| <i>rhlC</i>    | <i>rhlC</i> -F | GTCCACGTGGTCGATGAAC  | 58.8               |
|                | <i>rhlC</i> -R | CCTGGTCGACTCGTCATTCT | 59.3               |

\* Primer 907-R used as internal primer for 16S rRNA sequencing
